# Supplementary material for: Promising use of metformin in treating neurological disorders: biomarker-guided therapies
Source: PubMed Central journal article supplement — Neural Regen Res. 2023 Sep 22;19(5):1045–55. doi: 10.4103/1673-5374.385286 (PMC10749596; doi:10.4103/1673-5374.385286), 2023-09-22
Supplement: NRR-19-1045_Suppl2.pdf [file NRR-19-1045_Suppl2.pdf]

**Additional Table 1 The positive effect of metformin on neurological diseases in humans and *in vivo***

| Disease           | Model                  | Treatment                       | Outcome | Specific outcome                                                                                     | Author          | Year |
|-------------------|------------------------|---------------------------------|---------|------------------------------------------------------------------------------------------------------|-----------------|------|
| <b>AD, PD, HD</b> | Human                  | T2D+                            | Improve | Lower risk of NDD (AD, PD, HD)                                                                       | Shi et al.      | 2019 |
| <b>AD</b>         | APP/PS1-AD mouse model | 200 mg/kg/day for 8 weeks       | Improve | Alleviate behavioral changes                                                                         | Lu et al.       | 2020 |
| <b>AD</b>         | APP/PS1-AD mouse model | 4 mg/mL for 4 months            | Improve | Metformin ameliorated the microglial autophagy impairment, reduced A $\beta$ load, and tau pathology | Chen et al.     | 2021 |
| <b>AD</b>         | 3xTg-AD mouse model    | 4 mg/mL for 6 weeks             | Improve | Alleviates behavioral changes                                                                        | Syal et al.     | 2020 |
| <b>AD</b>         | ApoE3-TR mouse model   | 300 mg/kg for 5 months          | Improve | Improve the cognition                                                                                | Zhang et al.    | 2019 |
| <b>AD</b>         | APP/PS1-AD mouse model | 5 mg/mL for 8 months            | Improve | Alleviates behavioral changes                                                                        | Matthes et al.  | 2018 |
| <b>AD</b>         | APP/PS1-AD mouse model | 3 mg/mL for 12 weeks            | Improve | Alleviates behavioral changes and reduced the accumulated brain A $\beta$ plaque                     | Xu et al.       | 2021 |
| <b>AD</b>         | APP/PS1-AD mouse model | 200 mg/kg metformin for 14 days | Improve | Improved spatial memory deficit, neuronal loss, and enhanced neurogenesis                            | Ou et al.       | 2018 |
| <b>AD</b>         | APP/PS1-AD mouse model | 200 mg/kg/day for 10 days       | Improve | Decreased tau phosphorylation                                                                        | Wang et al.     | 2020 |
| <b>AD</b>         | C57BL/6J mice          | 5 g/L metformin for 2 weeks     | Improve | Decreased tau phosphorylation                                                                        | Hettich et al.  | 2014 |
| <b>AD</b>         | Human                  | T2D+                            | Improve | Lower risk of AD                                                                                     | Sluggett et al. | 2020 |
| <b>AD</b>         | Human                  | AD TD2-                         | Improve | Alleviates behavioral changes                                                                        | Koenig et al.   | 2017 |
| <b>AD</b>         | Human                  | T2D+                            | Improve | Lower risk of dementia                                                                               | Bohlken et al.  | 2018 |
| <b>AD</b>         | Human                  | General population              | Improve | Lower risk of AD                                                                                     | Zheng et al.    | 2022 |

|    |                                  |                                           |         |                                                                |                        |      |
|----|----------------------------------|-------------------------------------------|---------|----------------------------------------------------------------|------------------------|------|
| AD | Human                            | T2D+                                      | Improve | Lower risk of AD                                               | Torrandell-Haro et al. | 2022 |
| AD | Human                            | AD (MCI) T2D+                             | Improve | Improve cognitive performance                                  | Pomilio et al.         | 2022 |
| AD | Human                            | AD T2D+                                   | Improve | Slower cognitive decline                                       | Secnik et al.          | 2021 |
| AD | Human                            | T2D+                                      | Improve | Lower risk of dementia onset                                   | Charpignon et al.      | 2022 |
| AD | High-fat diet + A $\beta$        | 100 mg/kg for 8 weeks                     | Improve | Protective against A $\beta$                                   | Asadbegi et al.        | 2016 |
| AD | PS19 mice                        | 4 mg/mL for 4 months                      | Improve | Improved learning and memory and decreased tau phosphorylation | Zhao et al.            | 2022 |
| AD | SAMP8 mouse model                | 20 mg/kg/day or 200 mg/kg/day for 8 weeks | Improve | Improved learning and memory                                   | Farr et al.            | 2019 |
| AD | Streptozocin (STZ)-induced model | Post-STZ                                  | Improve | Improved behavior                                              | Pilipenko et al.       | 2020 |
| AD | Streptozocin (STZ)-induced model | Post-STZ                                  | Improve | Improved memory and decreased tau phosphorylation              | Oliveira et al.        | 2021 |
| AD | Streptozocin (STZ)-induced model | Post-STZ                                  | Improve | Improved learning and memory                                   | Nassar et al.          | 2020 |
| AD | Streptozocin (STZ)-induced model | Post-STZ                                  | Improve | Improved learning and memory                                   | Kazkayasi et al.       | 2022 |
| AD | Streptozocin (STZ)-induced model | Pre- and post-STZ                         | Improve | Improved inflammation and learning and memory                  | Saffari et al.         | 2020 |

|           |                                         |                                                 |         |                                                                           |                           |       |
|-----------|-----------------------------------------|-------------------------------------------------|---------|---------------------------------------------------------------------------|---------------------------|-------|
| <b>AD</b> | Wild-type and human tau transgenic mice | 5 mg/mL for 16–24 days                          | Improve | Decreased tau phosphorylation                                             | Kickstein et al.          | 2010  |
| <b>HD</b> | zQ175-HD mouse model                    | 2 mg/mL for 3 months                            | Improve | Reduction of nuclear aggregates of mHtt and alleviates behavioral changes | Sanchis et al.            | 2019  |
| <b>HD</b> | Human                                   | T2D+                                            | Improve | Improves cognition                                                        | Hervás et al.             | 2017  |
| <b>HD</b> | Hdh150-HD mouse model                   | 5 mg/mL for 3 weeks                             | Improve | Reduced mHtt protein production and alleviates behavioral changes         | Arnoux et al.             | 2018  |
| <b>MS</b> | Cuprizone model                         | Simultaneous administer cuprizone and metformin | Improve | Attenuates inflammation and demyelination                                 | Abdi et al.               | 2021  |
| <b>MS</b> | Cuprizone model                         | Simultaneous administer cuprizone and metformin | Improve | Protected oligodendrocytes                                                | Largani et al.            | 2019  |
| <b>MS</b> | Cuprizone model                         | Post-cuprizone                                  | Improve | Lesion reduction and alleviates behavioral changes                        | Sanadgol et al.           | 2020  |
| <b>MS</b> | Cuprizone model                         | Post-cuprizone                                  | Improve | Promotes oligodendrocyte production                                       | Houshmand et al.          | 2019  |
| <b>MS</b> | EAE model                               | Post-EAE                                        | Improve | Reduced EAE symptoms                                                      | Sun et al.                | 2016  |
| <b>MS</b> | EAE model                               | Post-EAE                                        | Improve | Reduced EAE symptoms and inflammation                                     | Paintlia et al.           | 2013a |
| <b>MS</b> | EAE model                               | Post-EAE                                        | Improve | Attenuates inflammation and demyelination                                 | Paintlia et al.           | 2013b |
| <b>MS</b> | EAE model                               | During and post-EAE                             | Improve | Attenuates inflammation                                                   | Nath et al.               | 2009  |
| <b>MS</b> | Ethidium bromide (EB) model             | Post-EB                                         | Improve | Promotes remyelination                                                    | Arabmoazzen and Mirshekar | 2021  |
| <b>MS</b> | Ethidium bromide (EB) model             | Pre-EB                                          | Improve | Improved remyelination                                                    | Neumann et al.            | 2019  |
| <b>MS</b> | Human                                   | MS TD2-                                         | Improve | Attenuates inflammation                                                   | Negrotto et al.           | 2016  |
| <b>MS</b> | Lysolecithin                            | Post-lysolecithin injection                     | Improve | Improved behavior                                                         | Kosaraju et al.           | 2020  |

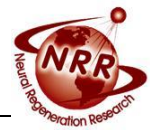

|               |                               |                                                  |         |                                                                             |                    |       |
|---------------|-------------------------------|--------------------------------------------------|---------|-----------------------------------------------------------------------------|--------------------|-------|
| <b>MS</b>     | Lysophosphatidylcholine model | Post-lysophosphatidylcholine                     | Improve | Attenuates inflammation and demyelination                                   | Esmailnejad et al. | 2021  |
| <b>PD</b>     | 6-OHDA model                  | Pre- and post-6-OHDA                             | Improve | Improves motor symptoms                                                     | Ryu et al.         | 2020  |
| <b>PD</b>     | BALB/c mice                   | Rotenone (brain slice)                           | Improve | Reduced apoptosis                                                           | Sardoiwala et al.  | 2020  |
| <b>PD</b>     | Haloperidol model             | Pre-haloperidol                                  | Improve | Attenuates behavioral changes and antioxidant activity                      | Adedeji et al.     | 2014  |
| <b>PD</b>     | MPTP model                    | Post-MPTP                                        | Improve | Reduced neuron death                                                        | Katila et al.      | 2017  |
| <b>PD</b>     | MPTP model                    | Pre- and post-MPTP                               | Improve | Reduced neuron death and improved behavior                                  | Kang et al.        | 2017  |
| <b>PD</b>     | MPTP model                    | Simultaneous administer MPTP and metformin       | Improve | Protected dopaminergic neurons                                              | Lu et al.          | 2016  |
| <b>PD</b>     | MPTP model                    | Pre- and during MPTP                             | Improve | Reduced neuron death and improved behavior                                  | Yan et al.         | 2017  |
| <b>PD</b>     | MPTP model                    | Pre- and post-MPTP                               | Improve | Improved behavior and antioxidant activity                                  | Patil et al.       | 2014  |
| <b>PD</b>     | MPTP model                    | Post-MPTP                                        | Improve | Attenuates neuron loss                                                      | Bayliss et al.     | 2016  |
| <b>PD</b>     | Rotenone model                | Simultaneous administered rotenone and metformin | Improve | Reduced neuron death and improved motor function                            | El-Ghaiesh et al.  | 2020  |
| <b>PD</b>     | Rotenone model                | Simultaneous administered rotenone and metformin | Improve | Alleviates depressive behavior, and inflammation, and improves neurogenesis | Mendonça et al.    | 2022b |
| <b>PD</b>     | Rotenone model                | Simultaneous administered rotenone and metformin | Improve | Alleviates behavioral changes                                               | Mendonça et al.    | 2022a |
| <b>PD</b>     | Rotenone model                | Pre- and post-rotenone                           | Improve | Improved behavior and inflammation                                          | Wang et al.        | 2020  |
| <b>Stroke</b> | Cerebral I/R                  | Pre-cerebral I/R                                 | Improve | Alleviates behavioral changes and protected against apoptosis               | Ge et al.          | 2017  |
| <b>Stroke</b> | Cerebral I/R                  | Pre-cerebral I/R                                 | Improve | Attenuated apoptotic cell death                                             | Ashabi et al.      | 2014  |

|               |                                          |                                 |         |                                                                                          |                     |      |
|---------------|------------------------------------------|---------------------------------|---------|------------------------------------------------------------------------------------------|---------------------|------|
| <b>Stroke</b> | Cerebral I/R                             | Post-cerebral I/R               | Improve | Improves antioxidants                                                                    | Zeng et al.         | 2019 |
| <b>Stroke</b> | Cerebral I/R                             | Post-cerebral I/R               | Improve | Reduced neuronal damage, promoted neuroblasts proliferation and neuronal differentiation | Yuan et al.         | 2019 |
| <b>Stroke</b> | Cerebral I/R                             | Post-cerebral I/R               | Improve | Attenuates inflammation and lipid peroxidation                                           | Abd-Elsameea et al. | 2014 |
| <b>Stroke</b> | Cerebral I/R                             | During and post-I/R             | Improve | Improves behavior and antioxidant levels                                                 | Fatemi et al.       | 2020 |
| <b>Stroke</b> | Global I/R                               | Pre-global I/R                  | Improve | Attenuates inflammation                                                                  | Ashabi et al.       | 2015 |
| <b>Stroke</b> | High-fat diet in spontaneous stroke mice | 6 months old till 12 months old | Improve | Delayed stroke occurrence                                                                | Hollander et al.    | 2017 |
| <b>Stroke</b> | Human                                    | T2D+                            | Improve | Less severe stroke, lower fatality, and lower disability rates                           | Tu et al.           | 2022 |
| <b>Stroke</b> | Human                                    | T2D+                            | Improve | Less severe strokes and better functional outcome                                        | Westphal et al.     | 2020 |
| <b>Stroke</b> | Human                                    | T2D+                            | Improve | Metformin improves post-stroke outcomes                                                  | Kersten et al.      | 2022 |
| <b>Stroke</b> | Human                                    | T2D+                            | Improve | Improved outcome                                                                         | Wu et al.           | 2016 |
| <b>Stroke</b> | Human                                    | T2D+                            | Improve | Improve mortality                                                                        | Horsdal et al.      | 2011 |
| <b>Stroke</b> | Human                                    | T2D+                            | Improve | Reduced neurological severity                                                            | Mima et al.         | 2015 |
| <b>Stroke</b> | Hypoxia-ischemia (H-I)                   | Post-H-I                        | Improve | Alleviates behavioral changes                                                            | Bourget et al.      | 2022 |
| <b>Stroke</b> | Hypoxia-ischemia (H-I)                   | Post-H-I                        | Improve | Alleviates behavioral changes, and inflammation, and promoted oligodendrogenesis         | Livingston et al.   | 2020 |
| <b>Stroke</b> | Hypoxia-ischemia (H-I)                   | Post-H-I                        | Improve | Inhibition of neuronal apoptosis and inflammation                                        | Fang et al.         | 2017 |
| <b>Stroke</b> | Hypoxia-ischemia                         | Post-hypoxia                    | Improve | Promotes NPC migration, and differentiation, and                                         | Dadwal et al.       | 2015 |

|               | (H-I)                                                 |                      |         | restores sensory-motor function                                  |              |       |
|---------------|-------------------------------------------------------|----------------------|---------|------------------------------------------------------------------|--------------|-------|
| <b>Stroke</b> | Intraventricular hemorrhage (IVH)                     | Post-IVH             | Improve | Alleviates behavioral changes                                    | Cao et al.   | 2022  |
| <b>Stroke</b> | Middle cerebral artery occlusion (MCAO)               | Post-MCAO            | Improve | Promoted functional recovery                                     | Jin et al.   | 2014  |
| <b>Stroke</b> | Middle cerebral artery occlusion (MCAO)               | Pre-MCAO             | Improve | Decreased neurobehavior scores, infarct area, and apoptosis      | Wang et al.  | 2021  |
| <b>Stroke</b> | Middle cerebral artery occlusion (MCAO)               | During and post-MCAO | Improve | Promoted focal angiogenesis and neurogenesis                     | Liu et al.   | 2014b |
| <b>Stroke</b> | Middle cerebral artery occlusion/reperfusion (MCAO/R) | Post-MCAO            | Improve | Attenuates neurological deficits and neuronal apoptosis          | Ruan et al.  | 2021  |
| <b>Stroke</b> | Middle cerebral artery occlusion/reperfusion (MCAO/R) | Post-MCAO            | Improve | Alleviates behavioral deficits and enhanced angiogenesis         | Venna et al. | 2014  |
| <b>Stroke</b> | Permanent middle cerebral artery occlusion (pMCAO)    | Pre-MCAO             | Improve | Reduced infarct volume, neurological deficits and cell apoptosis | Jiang et al. | 2014  |
| <b>Stroke</b> | Permanent middle cerebral artery occlusion (pMCAO)    | Pre-MCAO             | Improve | Reduced infarct volume and neurological deficits                 | Zhu et al.   | 2015  |

|               |                                                                                       |                                         |         |                                                                                                                 |                    |      |
|---------------|---------------------------------------------------------------------------------------|-----------------------------------------|---------|-----------------------------------------------------------------------------------------------------------------|--------------------|------|
| <b>Stroke</b> | Permanent middle cerebral artery occlusion (pMCAO)                                    | Pre-MCAO                                | Improve | Decreased neurological score, infarct area, and apoptosis                                                       | Deng et al.        | 2016 |
| <b>Stroke</b> | Permanent middle cerebral artery occlusion (pMCAO)                                    | Post-MCAO                               | Improve | Improves neurological state and reduces infarct size                                                            | Zemgulyte et al.   | 2021 |
| <b>Stroke</b> | Permanent middle cerebral artery occlusion (pMCAO) in spontaneously hypertensive rats | Pre-MCAO                                | Improve | Increased life span and reduced the infarct area                                                                | Guo et al.         | 2017 |
| <b>Stroke</b> | Transient forebrain global cerebral ischemia                                          | Pre-GCI                                 | Improve | Improved memory and neurological scores                                                                         | Ghadernzhad et al. | 2016 |
| <b>Stroke</b> | Transient forebrain global cerebral ischemia                                          | Pre-GCI                                 | Improve | Alleviates behavioral changes                                                                                   | Sarkaki et al.     | 2015 |
| <b>Stroke</b> | Transient forebrain global ischemia                                                   | Pre-transient forebrain global ischemia | Improve | Alleviates behavioral changes                                                                                   | Ashabi et al.      | 2016 |
| <b>Stroke</b> | Transient global cerebral ischemia (tGCI)                                             | Pre-tGCI                                | Improve | Attenuated BBB disruption                                                                                       | Farbood et al.     | 2015 |
| <b>Stroke</b> | Transient middle cerebral artery occlusion (tMCAO)                                    | Post-MCAO                               | Improve | Reduced cerebral infarction volume, improved the neurological deficit score, and ameliorated neuronal apoptosis | Liu et al.         | 2022 |

| mouse model   |                                                                |           |         |                                                                                        |            |       |
|---------------|----------------------------------------------------------------|-----------|---------|----------------------------------------------------------------------------------------|------------|-------|
| <b>Stroke</b> | Transient middle cerebral artery occlusion (tMCAO) mouse model | Post-MCAO | Improve | Alleviates BBB disruption and caused protected against apoptosis                       | Liu et al. | 2022  |
| <b>Stroke</b> | Transient middle cerebral artery occlusion (tMCAO) mouse model | Post-MCAO | Improve | Improved neurobehavioral outcomes, reduced infarct volume, and attenuated inflammatory | Liu et al. | 2014a |

AD: Alzheimer's disease; A $\beta$ : amyloid beta; BBB: blood-brain barrier; EAE: experimental autoimmune encephalomyelitis; GCI: global cerebral ischemia; HD: Huntington's disease; I/R: ischemia/reperfusion; MPTP: 1-methyl-4-phenyl-1,2,3,6-tetrahydropyridine; MS: multiple sclerosis; NDD: neurodegenerative diseases; NPC: neural progenitor cell; PD: Parkinson's disease.
